# Supplementary material
Source: PubMed Central journal article supplement (PMC3490491)
Supplement: NIHMS316511-supplement-02.pdf [file NIHMS316511-supplement-02.pdf]

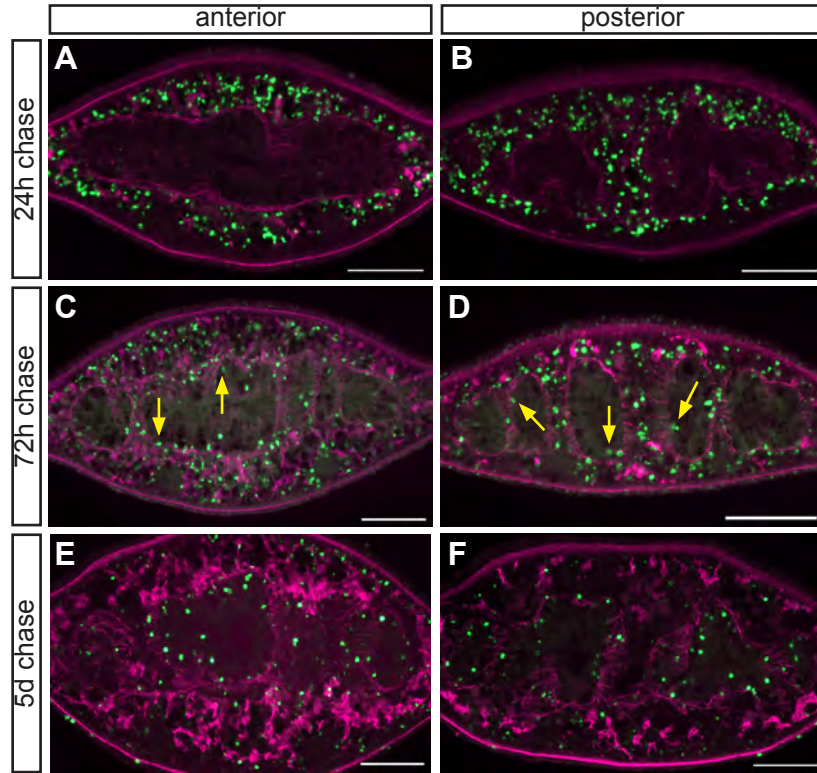

Supplemental Fig. 1.

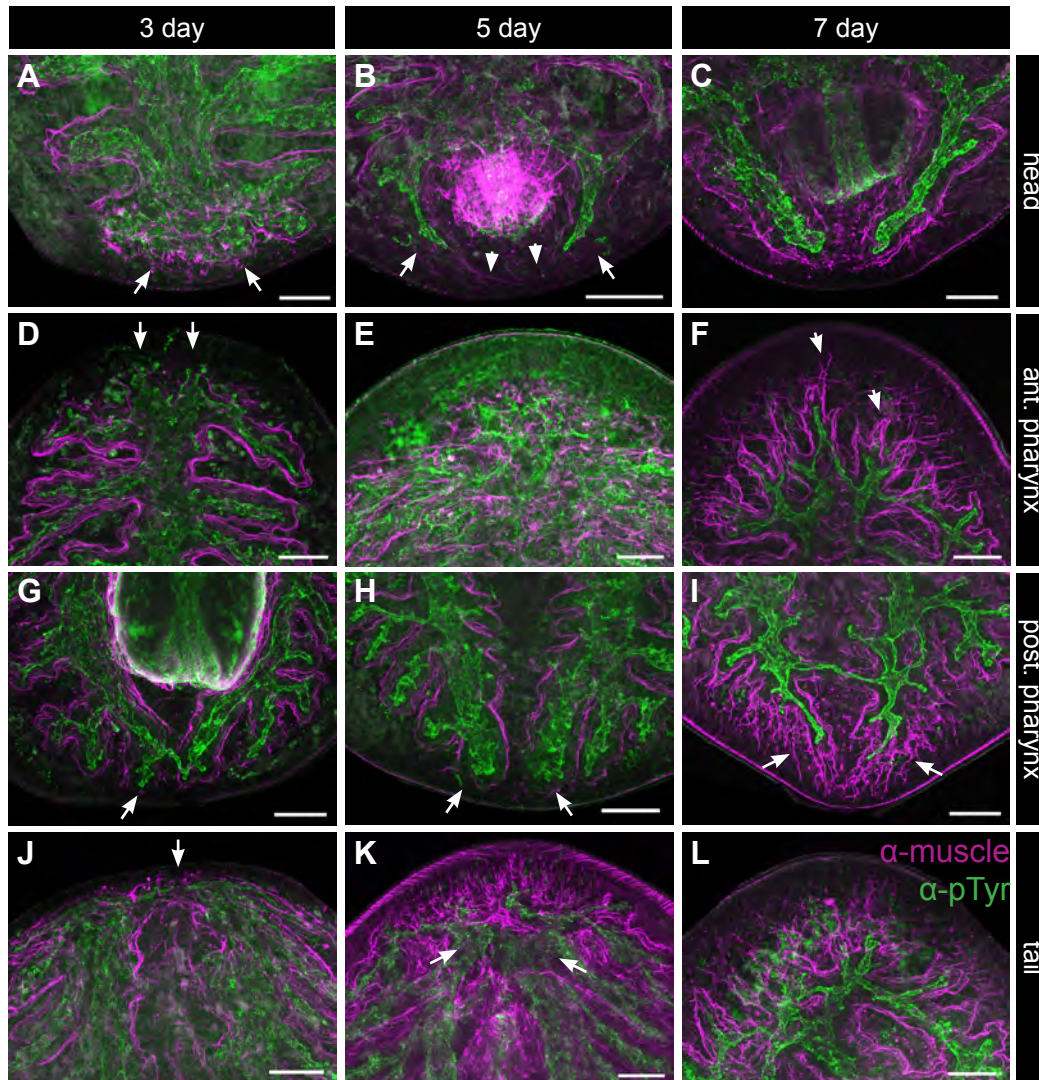

Supplemental Figure 2.

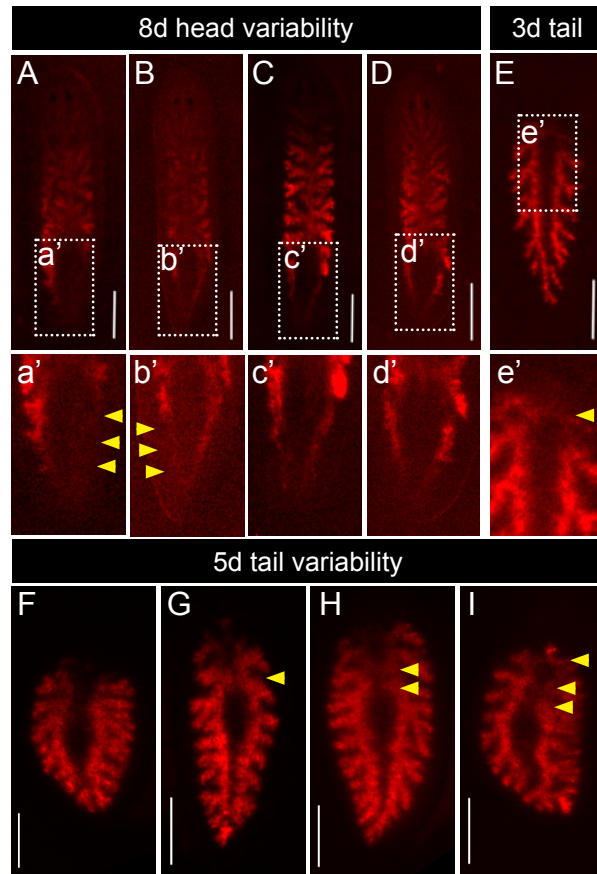

Supplemental Figure 3.

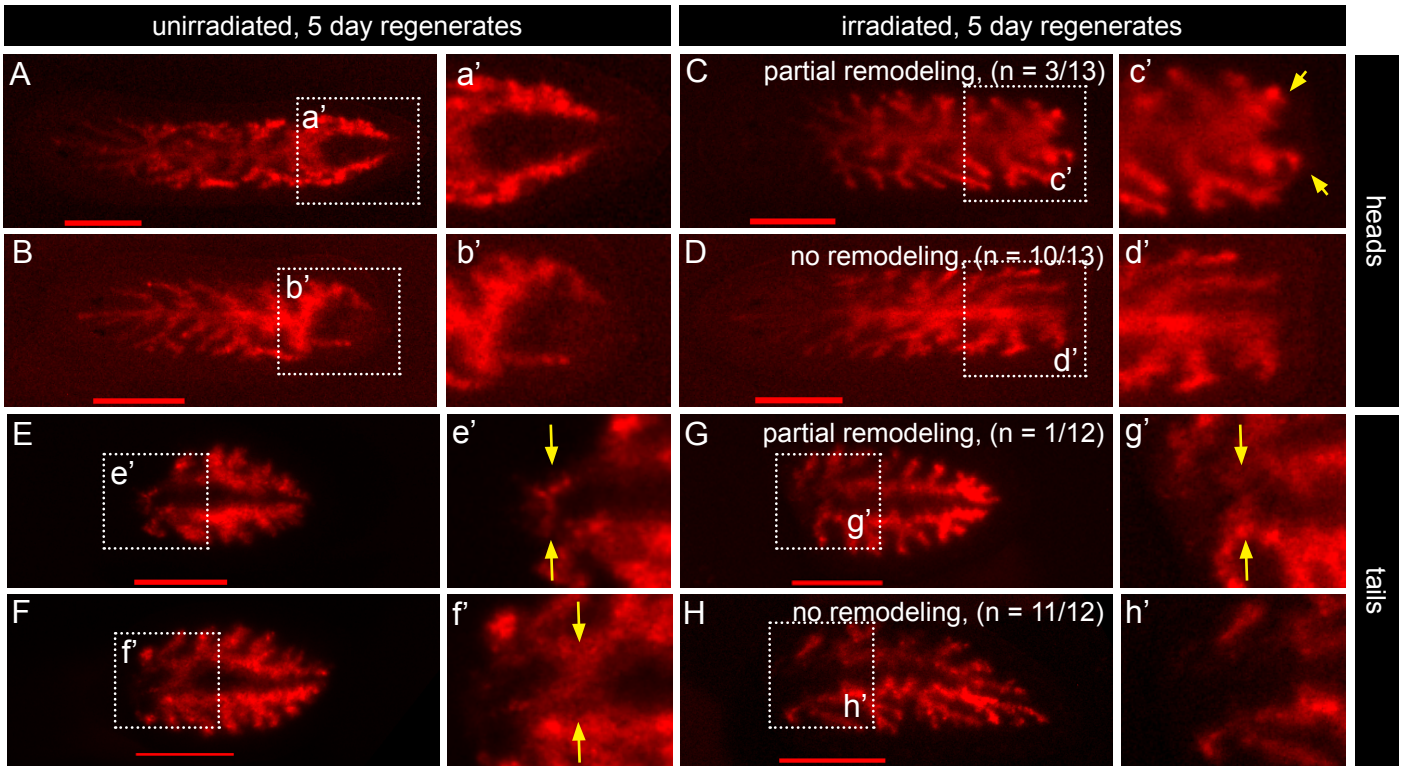

Supplemental Figure 4.



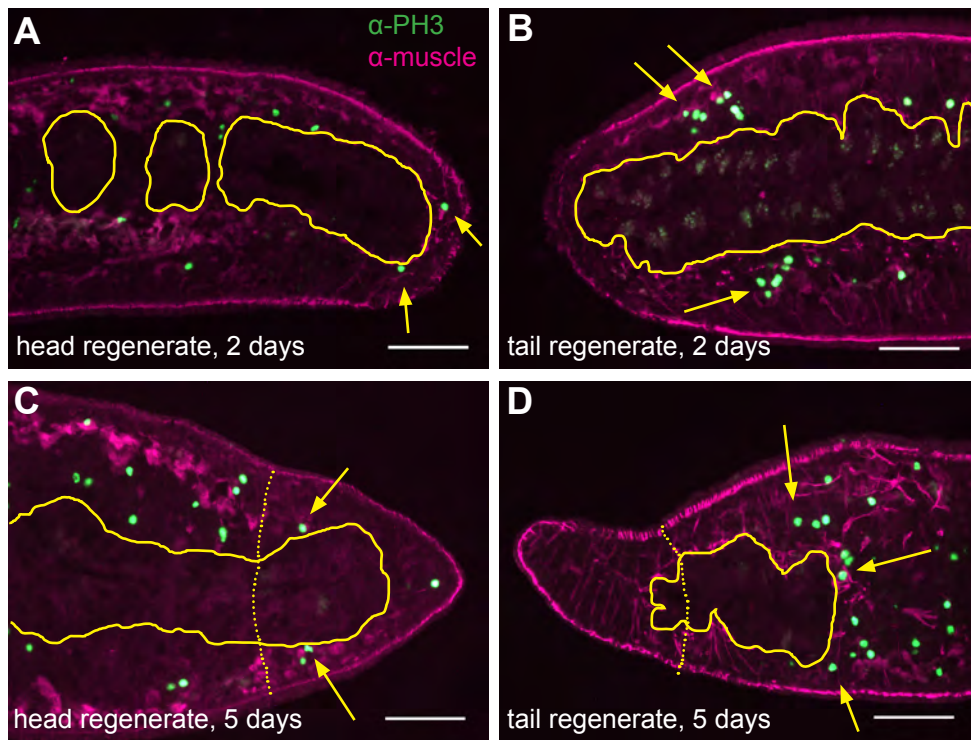

Supplemental Figure 5.

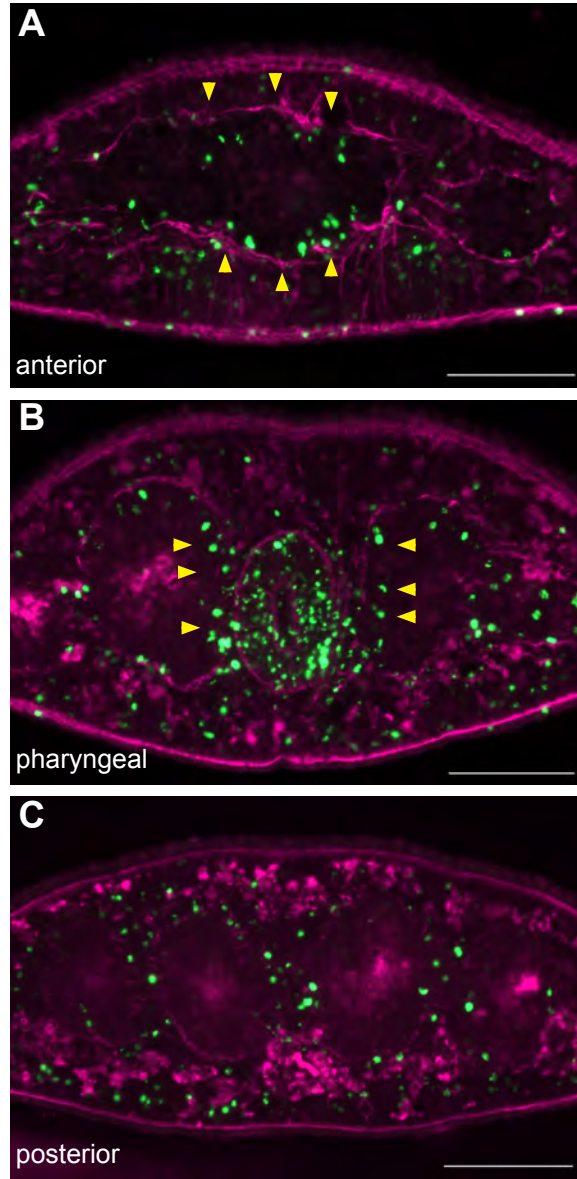

Supplemental Figure 6.
